# Supplementary material for: Nanoparticle-supported polymer brushes for temperature-regulated glycoprotein separation: investigation of structure–function relationship
Source: Royal Society of Chemistry journal article supplement (doi:10.1039/c8tb00627j), 2018-01-01
Supplement: c8tb00627j1.pdf [file c8tb00627j1.pdf]

*Supporting Information*

**Nanoparticle-supported polymer brushes for temperature-regulated glycoprotein separation: investigation of structure-function relationship**

Huiting Ma,<sup>1,2</sup> Lingdong Jiang,<sup>1</sup> Solmaz Hajizadeh,<sup>1</sup> Haiyue Gong,<sup>1</sup> Bin Lu,<sup>2\*</sup> Lei Ye<sup>1\*</sup>

<sup>1</sup> Division of Pure and Applied Biochemistry, Department of Chemistry, Lund University,  
Box 124, 221 00 Lund, Sweden

<sup>2</sup> Key Laboratory of Environment and Health, Ministry of Education & Ministry of  
Environmental Protection, State Key Laboratory of Environmental Health (Incubating),  
School of Public Health, Tongji Medical College, Huazhong University of Science and  
Technology, Wuhan, Hubei 430030, China

Corresponding author:

<sup>1\*</sup> Lei Ye, Email: [lei.ye@tbiokem.lth.se](mailto:lei.ye@tbiokem.lth.se)

<sup>2\*</sup> Bin Lu, Email: [lubin@mails.tjmu.edu.cn](mailto:lubin@mails.tjmu.edu.cn)

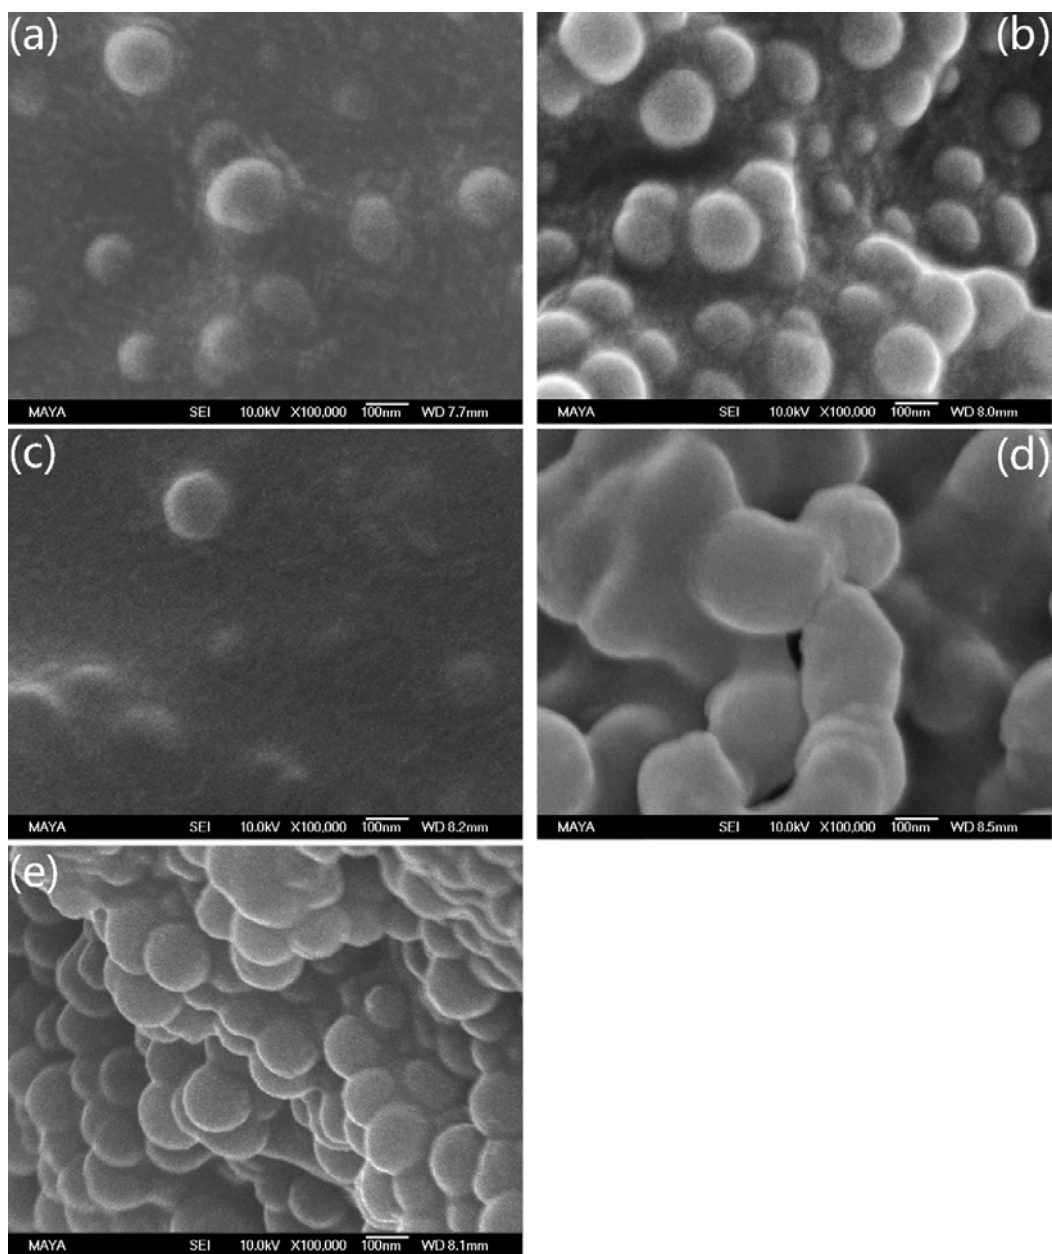

**Figure S1.** SEM images of (a) Si@NH<sub>2</sub>, (b) Si@initiator, (c) Si@pGMA, (d) Si@pco and (e) Si@pNIPAm.

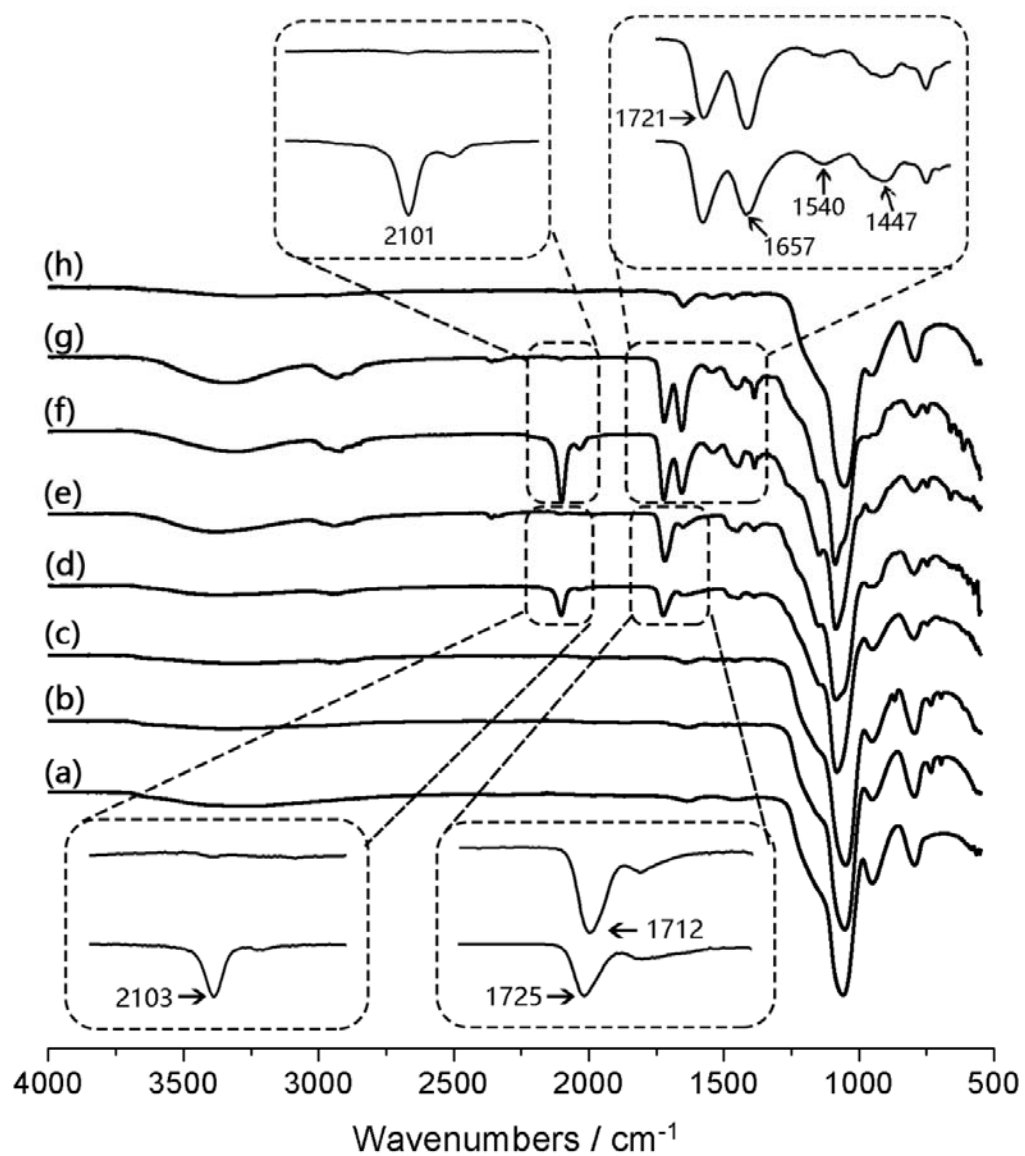

**Figure S2.** FT-IR spectra of (a) Si, (b) Si@NH<sub>2</sub>, (c) Si@initiator, (d) Si@pGMA-N<sub>3</sub>@N<sub>3</sub>, (e) Si@pGMA-OH@N<sub>3</sub>, (f) Si@pco-N<sub>3</sub>@N<sub>3</sub>, (g) Si@pco-OH@N<sub>3</sub>, (h) Si@pNIPAm@N<sub>3</sub>.

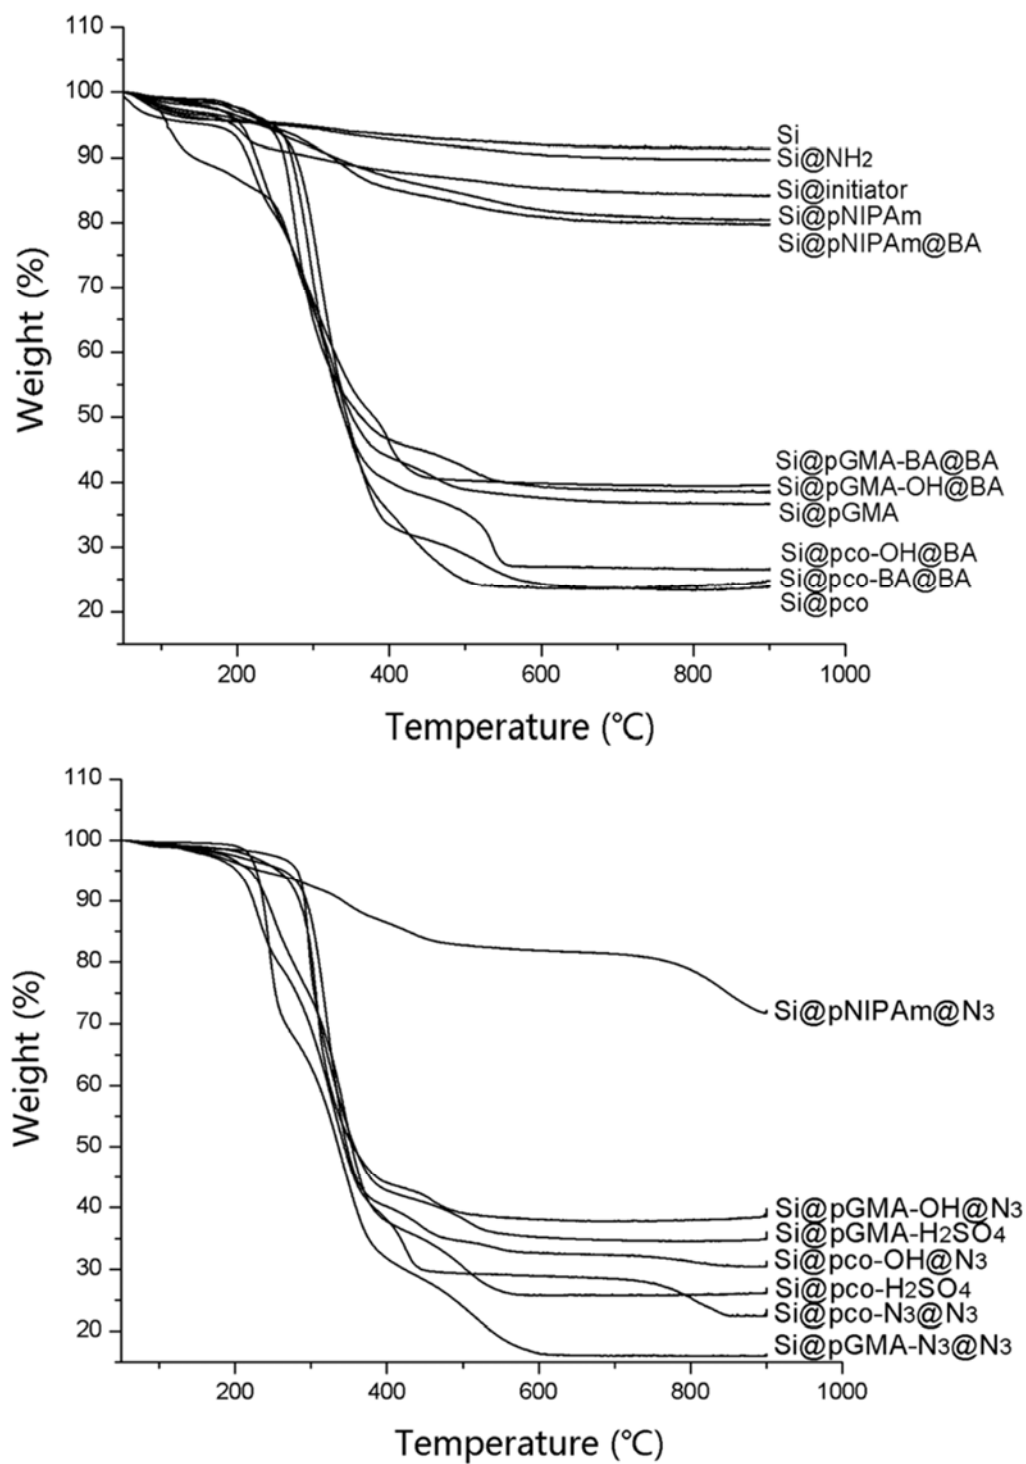

**Figure S3.** TGA analysis results of the nanoparticles and nanoparticle-supported polymer brushes.

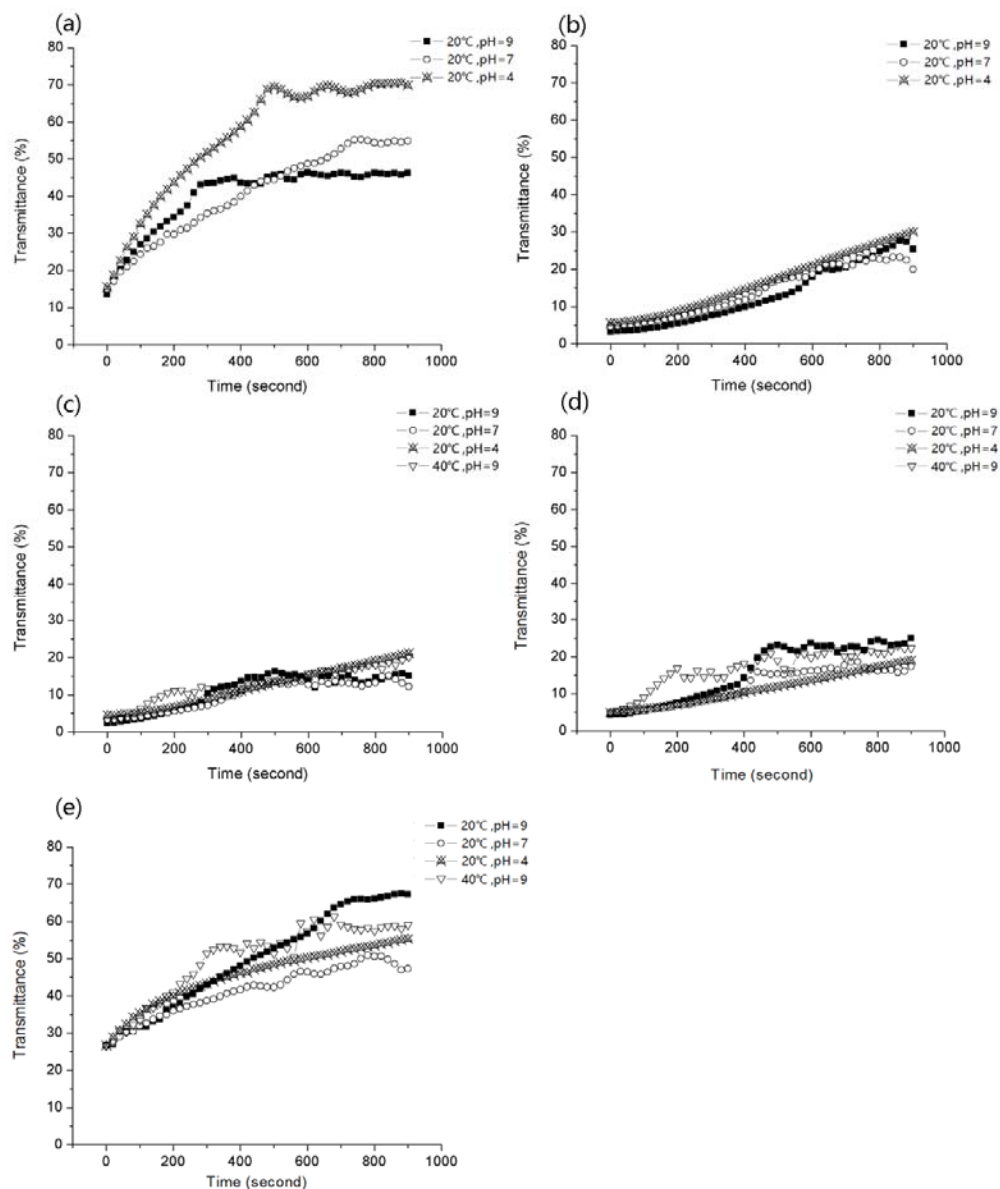

**Figure S4.** Measurement of the rate of sedimentation of composite particles (a) Si@pGMA-BA@BA, (b) Si@pGMA-OH@BA, (c) Si@pco-BA@BA, (d) Si@pco-OH@BA and (e) Si@pNIPAm@BA in buffer adjusted to different pH values and at different temperatures. The composite particles (3 mg) were dispersed in 2 mL of 20 mM phosphate buffer (pH adjusted to 9.0 and 7.4) or 20 mM acetate buffer (pH 4.0), both containing 0.5 M NaCl. The particle suspension was sonicated for 5 min and immediately transferred into a UV-Vis spectrophotometer. The transmittance of the particle suspension at 800 nm was measured continuously for 15 min. The temperature of the particle suspension was maintained at 20 °C or 40 °C during the measurement.

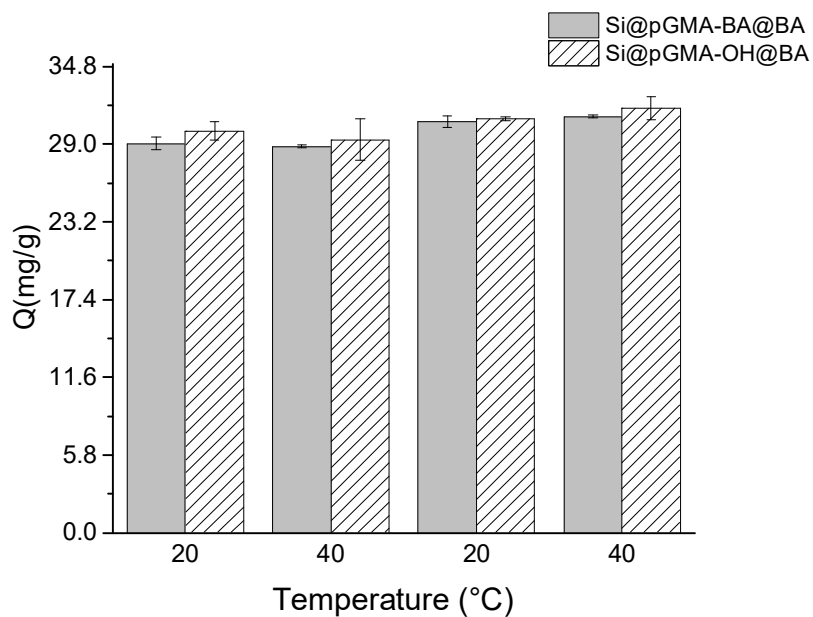

**Figure S5.** HRP binding to Si@pGMA-BA@BA and Si@pGMA-OH@BA particles measured at 20 °C and 40 °C. The particles were mixed with a protein solution containing 0.1 mg/mL HRP and 1 mg/mL BSA in pH 9 buffer. The samples were kept at 20 °C and 40 °C for 2 h before the free HRP was measured.
